# Supplementary material for: New sterically hindered tin(iv) siloxane precursors to tinsilicate materials: synthesis, spectral, structural and photocatalytic studies
Source: Royal Society of Chemistry journal article supplement (doi:10.1039/c5ra23424g), 2015-12-18
Supplement: c5ra23424g1.pdf [file c5ra23424g1.pdf]

## **New Sterically Hindered Tin(IV) Siloxane Precursors to Tinsilicate Materials:**

### **Synthesis, Spectral, Structural and Photocatalytic Studies†‡**

Mohan Gopalakrishnan<sup>a</sup> and Nallasamy Palanisami<sup>\*a</sup>

<sup>a</sup>Materials Chemistry Division, School of Advanced Sciences, VIT University, Vellore 632 014,

Tamil Nadu, India.

Corresponding author: E-mail: palanisami.n@gmail.com; Tel: +91 98426 39776; Fax no:

+91416224 3092

**Table S1.**  $^{119}\text{Sn}$  and  $^{29}\text{Si}$  NMR chemical shift values for tin(IV) siloxanes **1–8**.

| Compounds | $\delta(^{119}\text{Sn})$<br>ppm | $\delta(^{29}\text{Si})$<br>ppm | Reference |
|-----------|----------------------------------|---------------------------------|-----------|
| <b>1</b>  | -149.60                          | -93.60                          | [1, 2]    |
| <b>2</b>  | -149.54                          | -93.37                          | [3, 1]    |
| <b>3</b>  | -148.98                          | -92.09                          | [4, 5]    |
| <b>4</b>  | -150.23                          | -91.62                          | [5, 6]    |
| <b>5</b>  | -151.31                          | -91.33                          | [7, 4]    |
| <b>6</b>  | -151.67                          | -91.32                          | [7, 2]    |
| <b>7</b>  | -151.34                          | -20.01                          | [8, 9]    |
| <b>8</b>  | -151.27                          | -20.08                          | [8, 9]    |

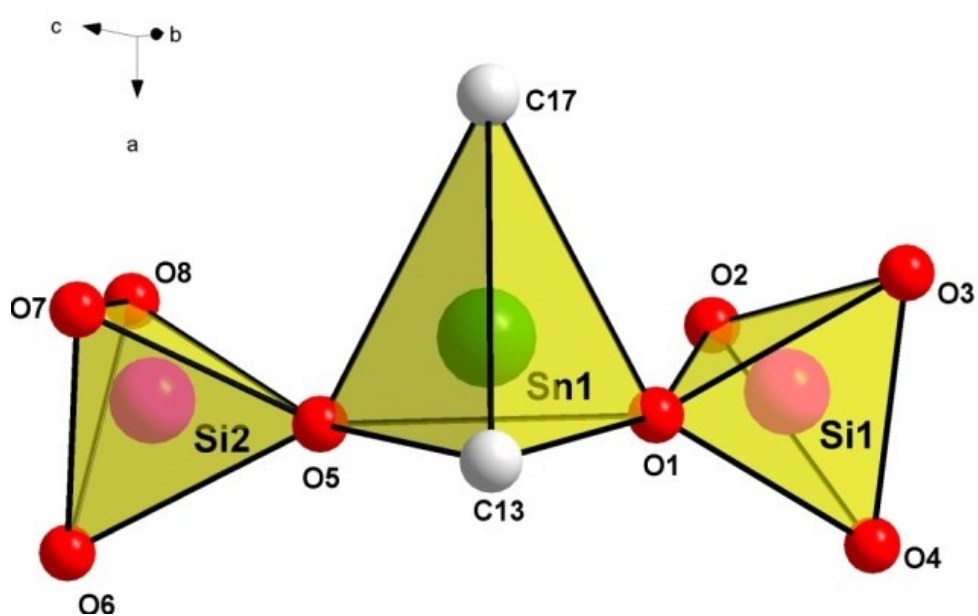

**Figure S1.** Geometry of tin and silicon in  $(^t\text{Bu})_2\text{Sn}(\text{OSi}(\text{O}^t\text{Bu})_3)_2$  (**1**).

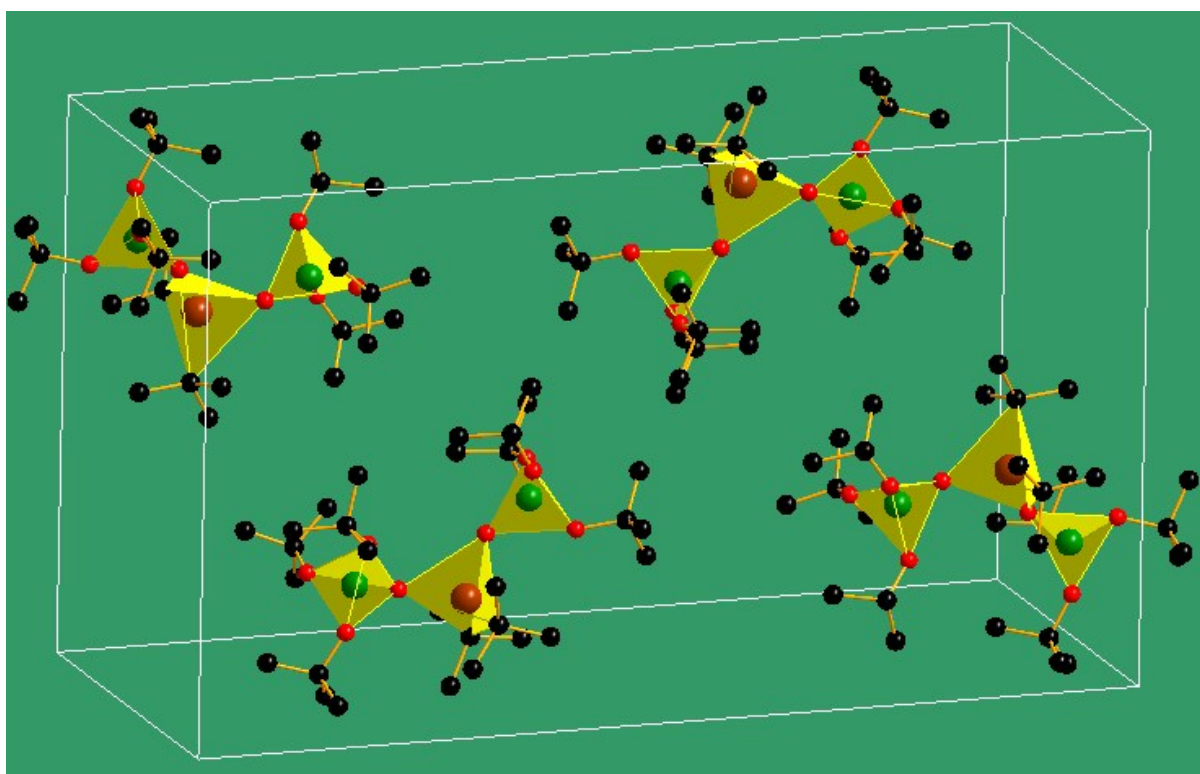

**Figure S2.** Unite cell packing pattern in  $[(t\text{Bu})_2\text{Sn}(\text{OSi}(\text{O}^t\text{Bu})_3)_2]$  (**1**) hydrogen atoms are omitted for clarity.

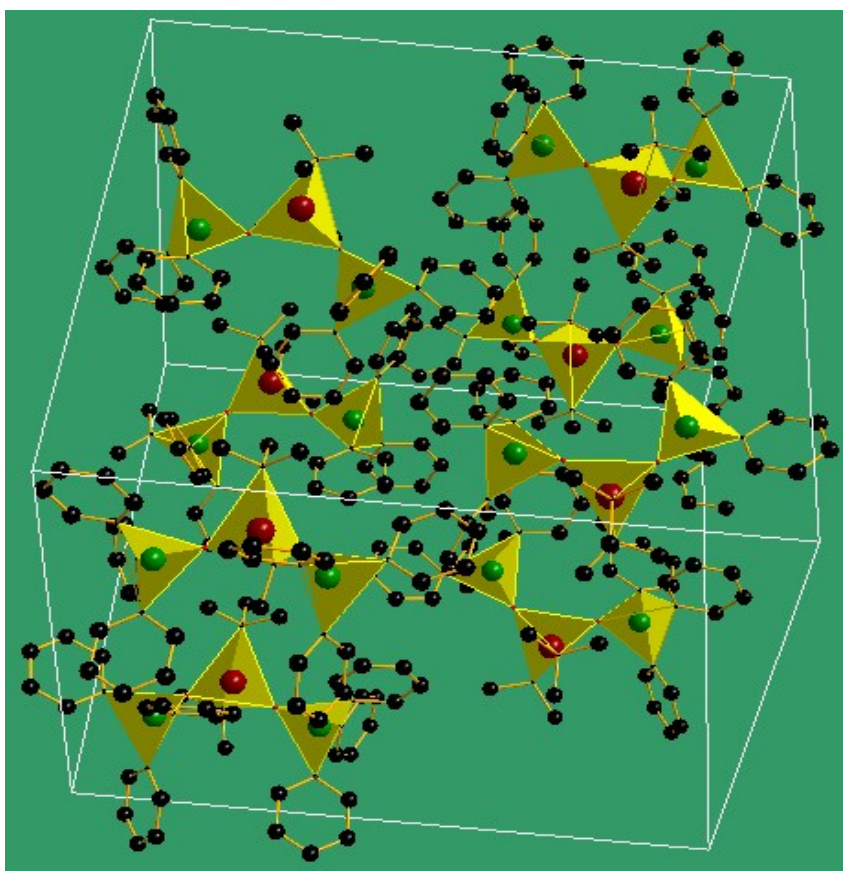

**Figure S3.** Unite cell packing pattern in  $[(t\text{Bu})_2\text{Sn}(\text{OSiPh}_3)_2]$  (**7**) hydrogen atoms are omitted for clarity.

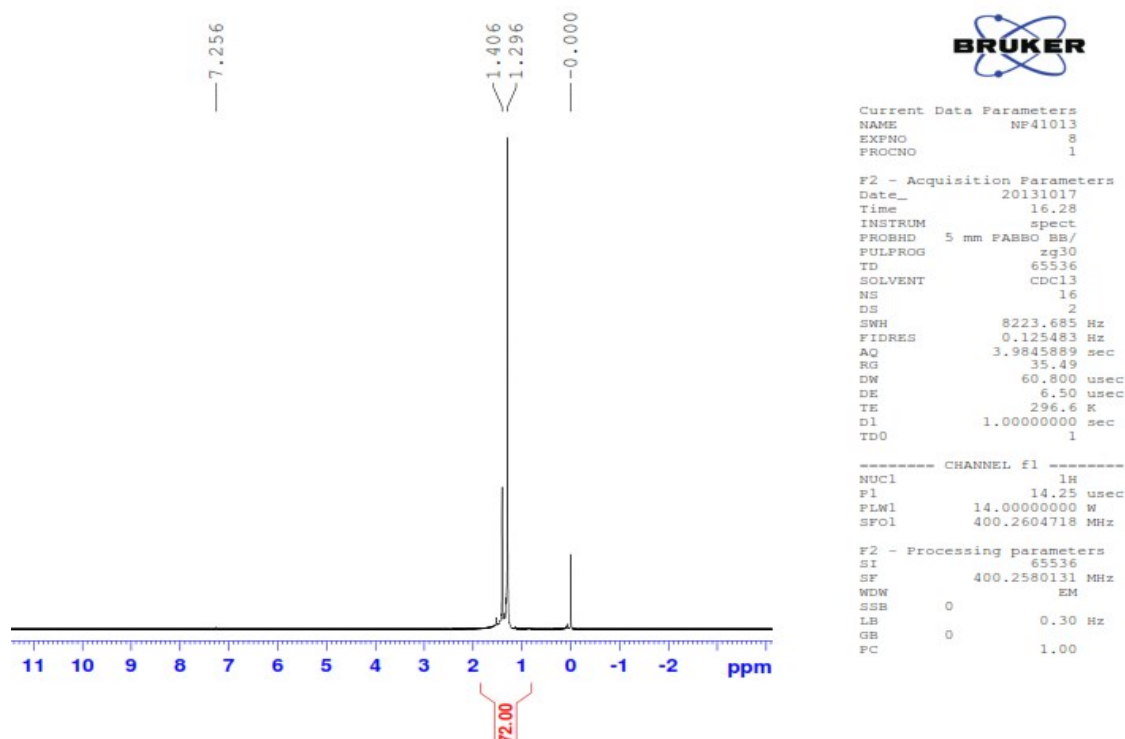

Figure S4.  $^1\text{H}$  NMR spectrum of  $[(t\text{Bu})_2\text{Sn}(\text{OSi}(\text{O}^t\text{Bu})_3)_2]$  (**1**) in  $\text{CDCl}_3$ .

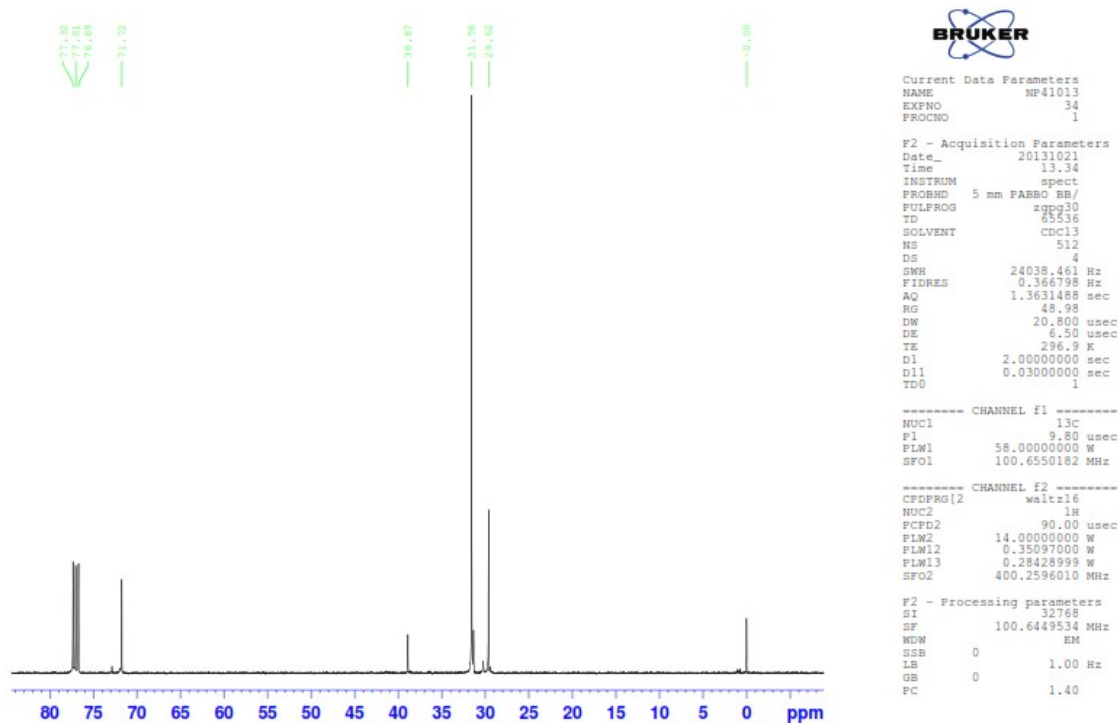

Figure S5.  $^{13}\text{C}$  NMR spectrum of  $[(t\text{Bu})_2\text{Sn}(\text{OSi}(\text{O}^t\text{Bu})_3)_2]$  (**1**) in  $\text{CDCl}_3$ .

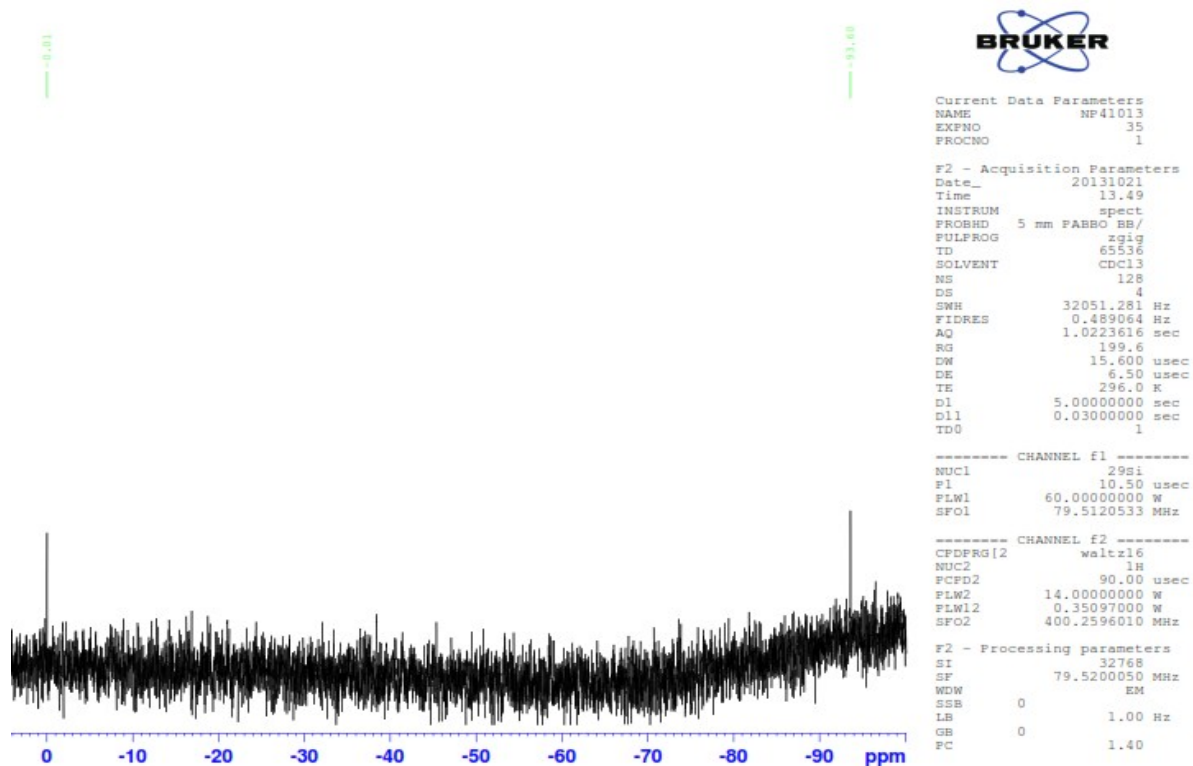

Figure S6.  $^{29}\text{Si}$  NMR spectrum of  $[(t\text{Bu})_2\text{Sn}(\text{OSi}(\text{O}^t\text{Bu})_3)_2]$  **1** in  $\text{CDCl}_3$ .

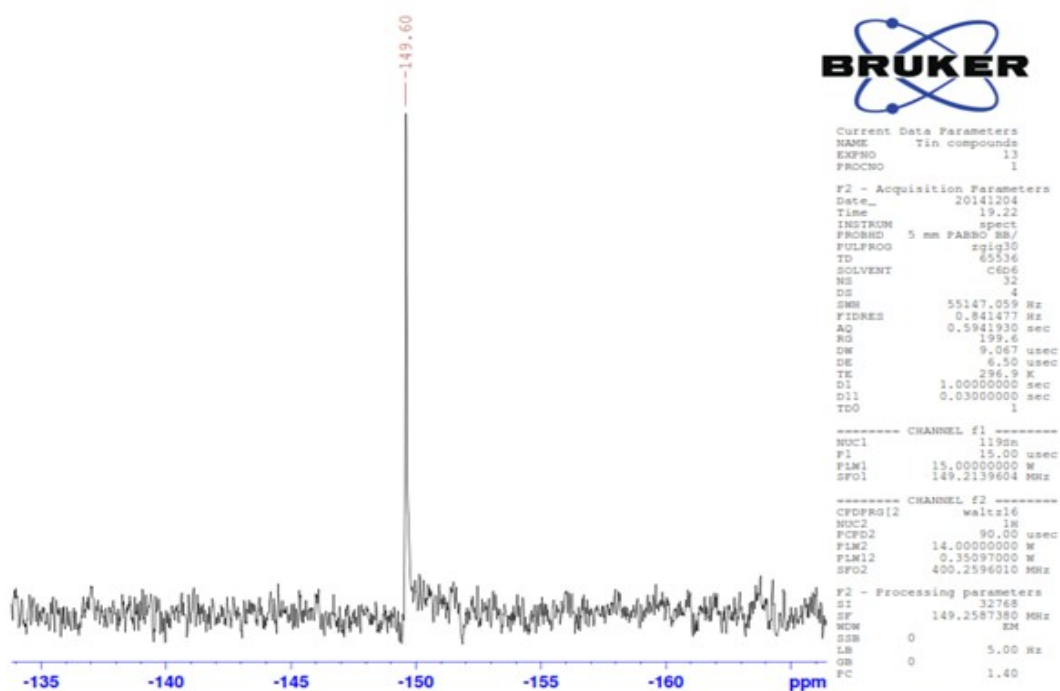

Figure S7.  $^{119}\text{Sn}$  NMR spectrum of  $[(t\text{Bu})_2\text{Sn}(\text{OSi}(\text{O}^t\text{Bu})_3)_2]$  (**1**) in  $\text{C}_6\text{D}_6$ .

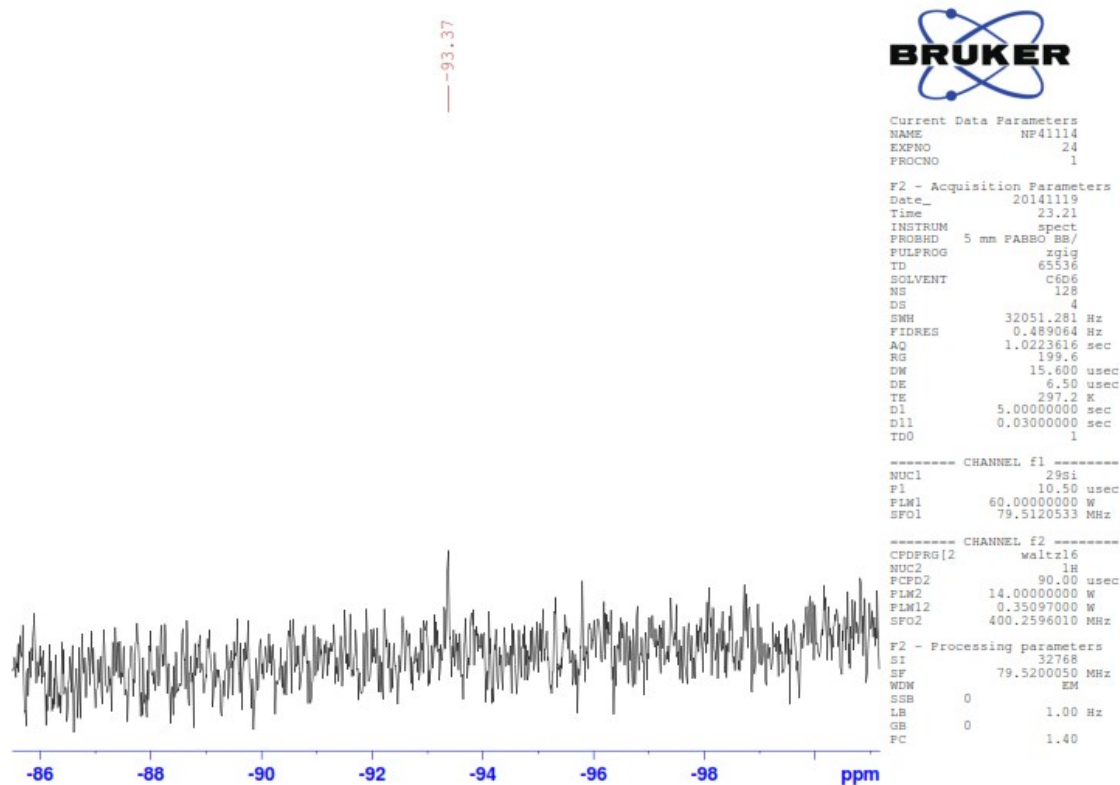

**Figure S8.**  $^{29}\text{Si}$  NMR spectrum of  $[(t\text{Bu})_2\text{Sn}(\text{OSi}(\text{O}^t\text{Bu})_3)\text{Cl}]$  (**2**) in  $\text{C}_6\text{D}_6$ .

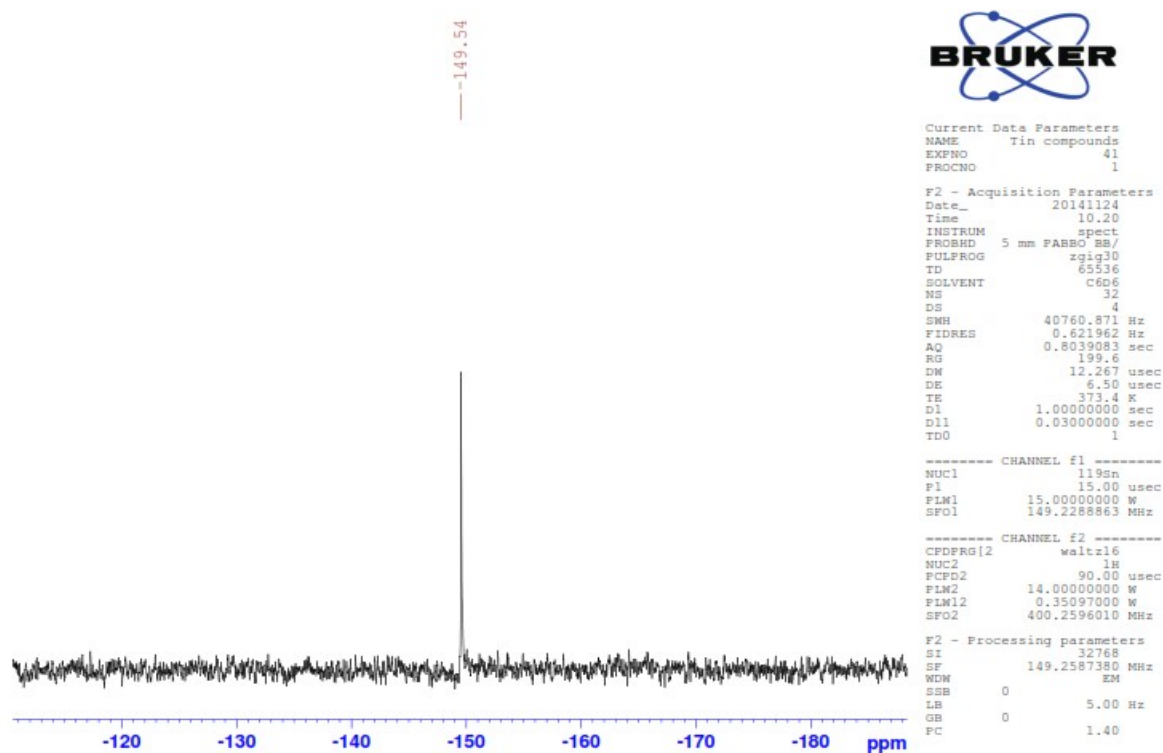

**Figure S9.**  $^{119}\text{Sn}$  NMR spectrum of  $[(t\text{Bu})_2\text{Sn}(\text{OSi}(\text{O}^t\text{Bu})_3)\text{Cl}]$  (**2**) in  $\text{C}_6\text{D}_6$ .

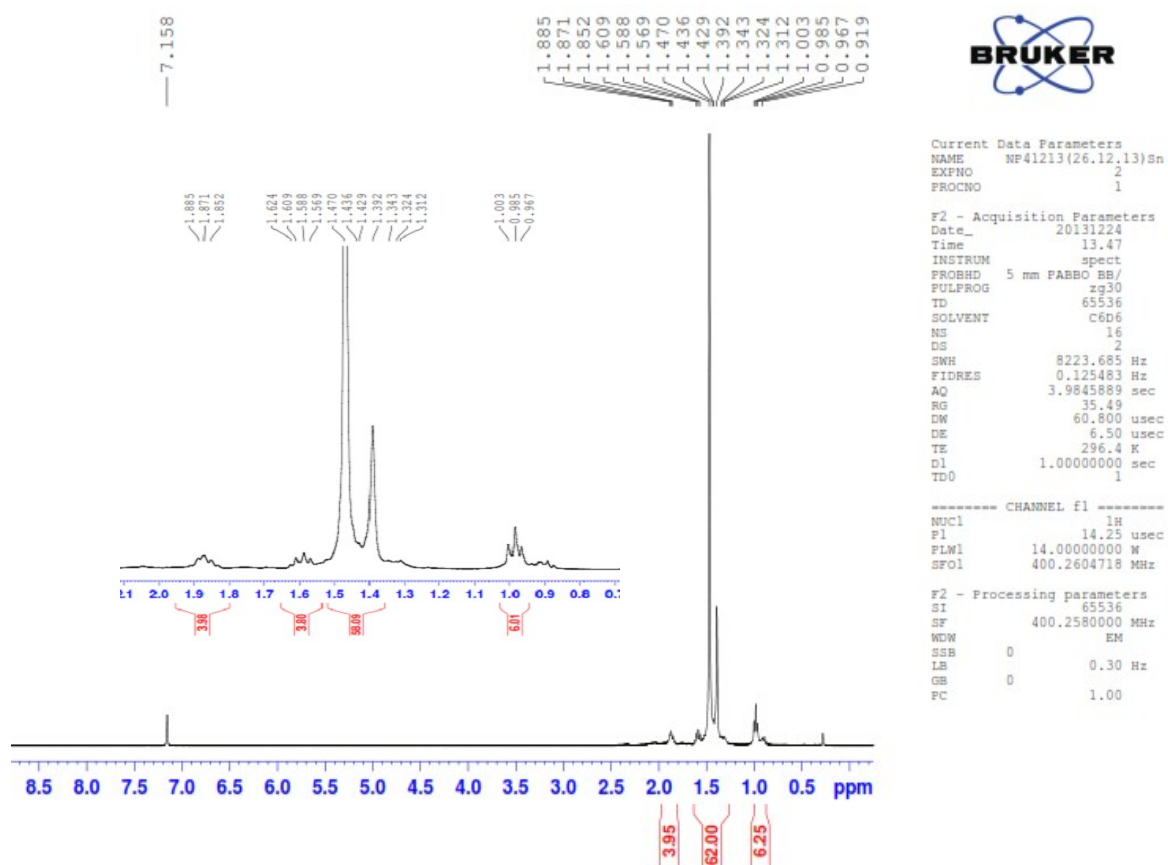

Figure S10.  $^1\text{H}$  NMR spectrum of  $[(n\text{-Bu})_2\text{Sn}(\text{OSi}(\text{O}^t\text{Bu})_3)_2]$  (**3**) in  $\text{C}_6\text{D}_6$ .

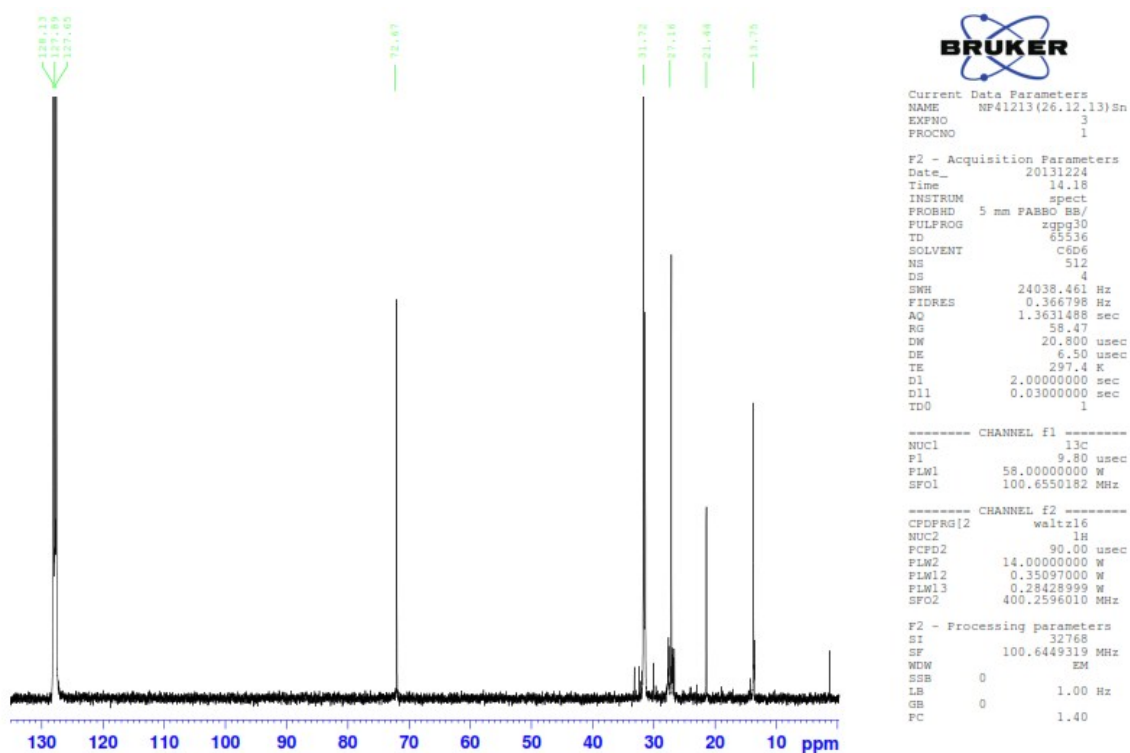

Figure S11.  $^{13}\text{C}$  NMR spectrum of  $[(n\text{-Bu})_2\text{Sn}(\text{OSi}(\text{O}^t\text{Bu})_3)_2]$  (**3**) in  $\text{C}_6\text{D}_6$ .

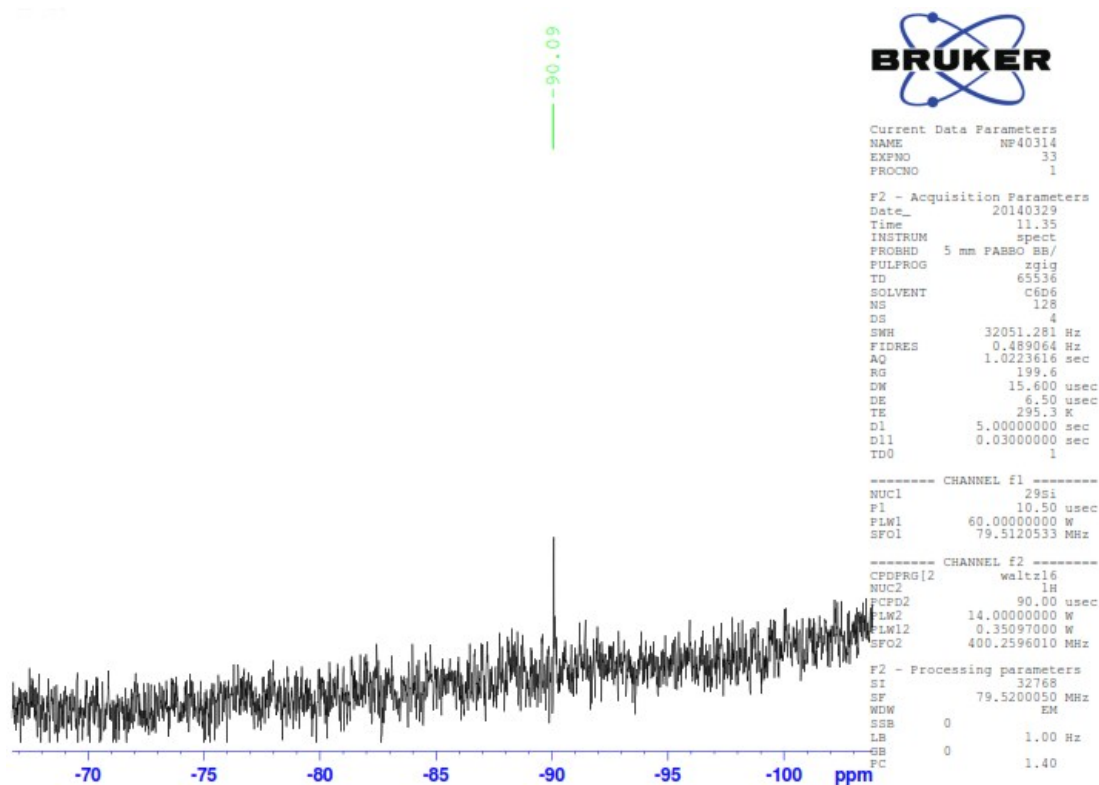

Figure S12.  $^{29}\text{Si}$  NMR spectrum of  $[(n\text{-Bu})_2\text{Sn}(\text{OSi}(\text{O}^t\text{Bu})_3)_2]$  (**3**) in  $\text{C}_6\text{D}_6$ .

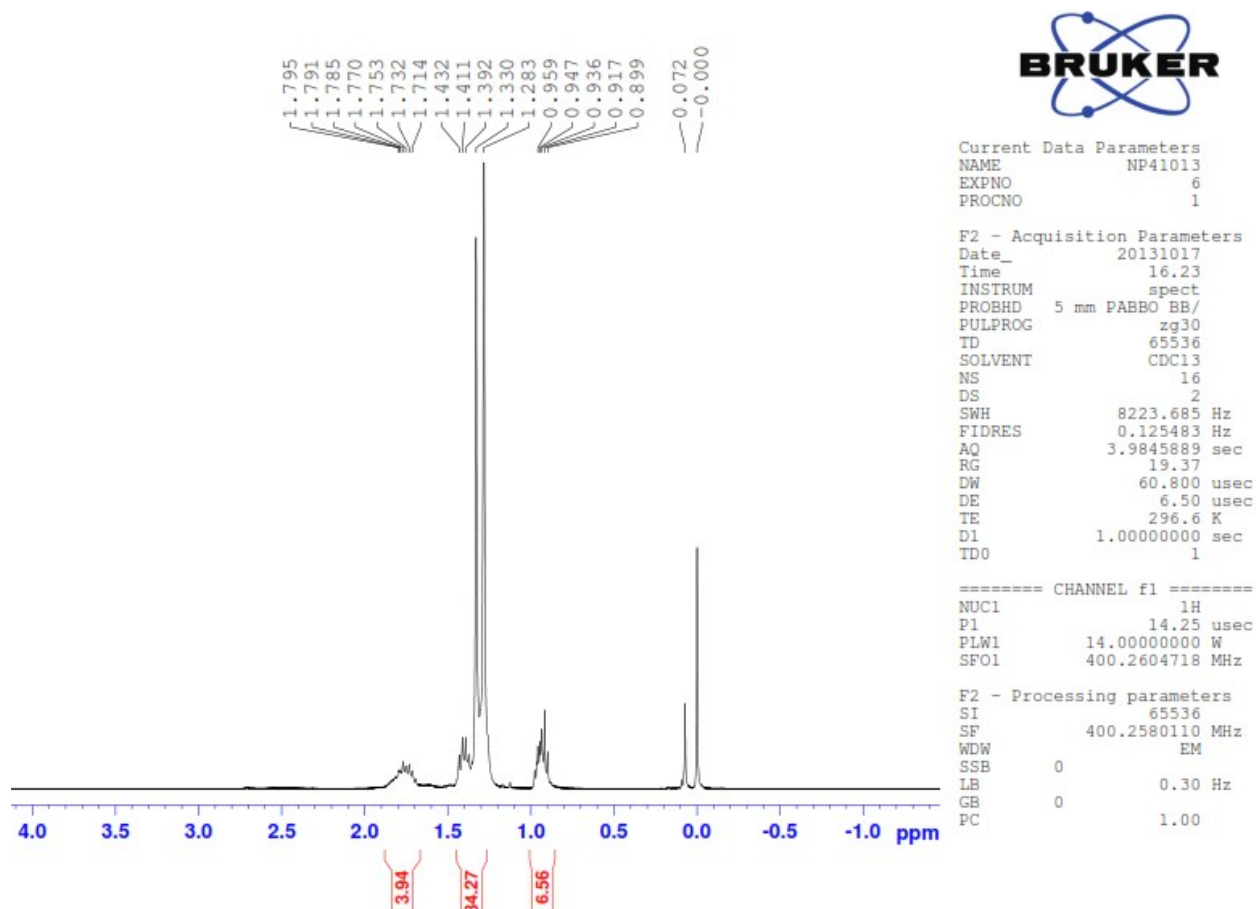

Figure S13.  $^1\text{H}$  NMR spectrum of  $[(n\text{-Bu})_2\text{Sn}(\text{OSi}(\text{O}^t\text{Bu})_3)\text{Cl}]$  (**4**) in  $\text{CDCl}_3$ .



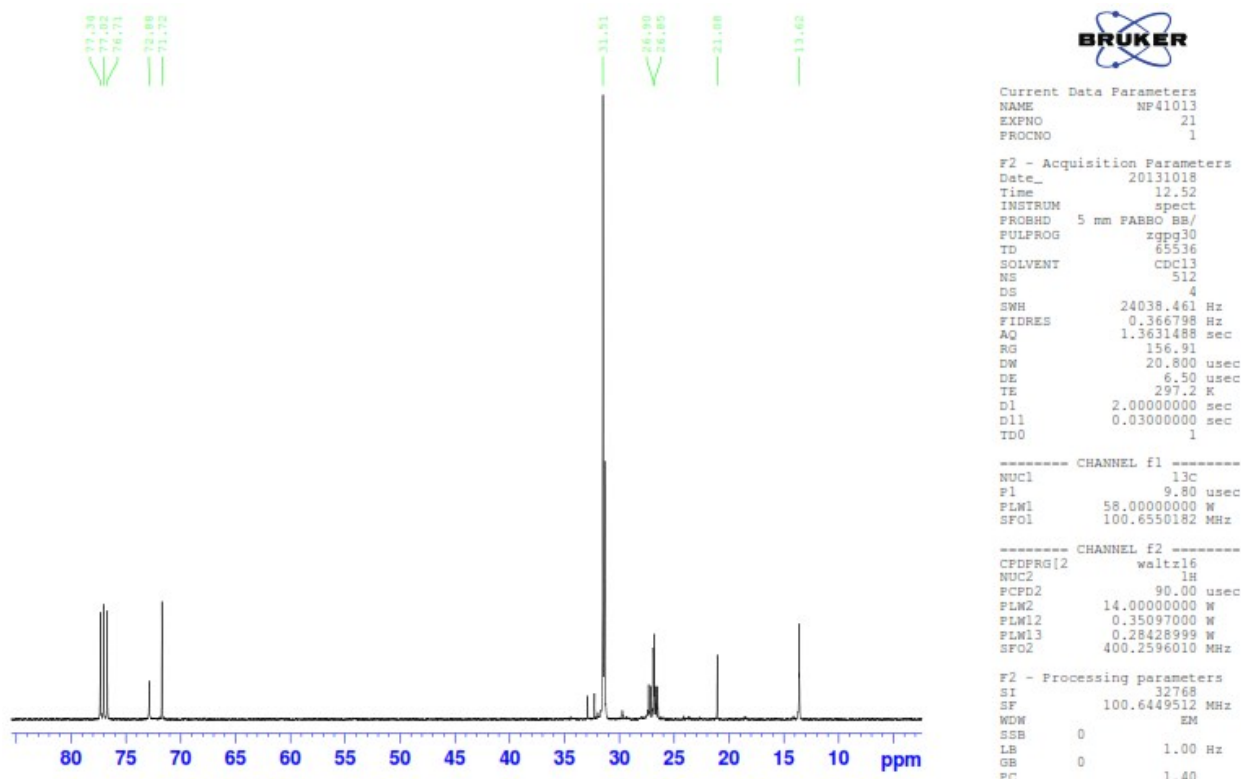

Figure S14.  $^{13}\text{C}$  NMR spectrum of  $[(n\text{-Bu})_2\text{Sn}(\text{OSi}(\text{O}^t\text{Bu})_3)\text{Cl}]$  (**4**) in  $\text{CDCl}_3$ .

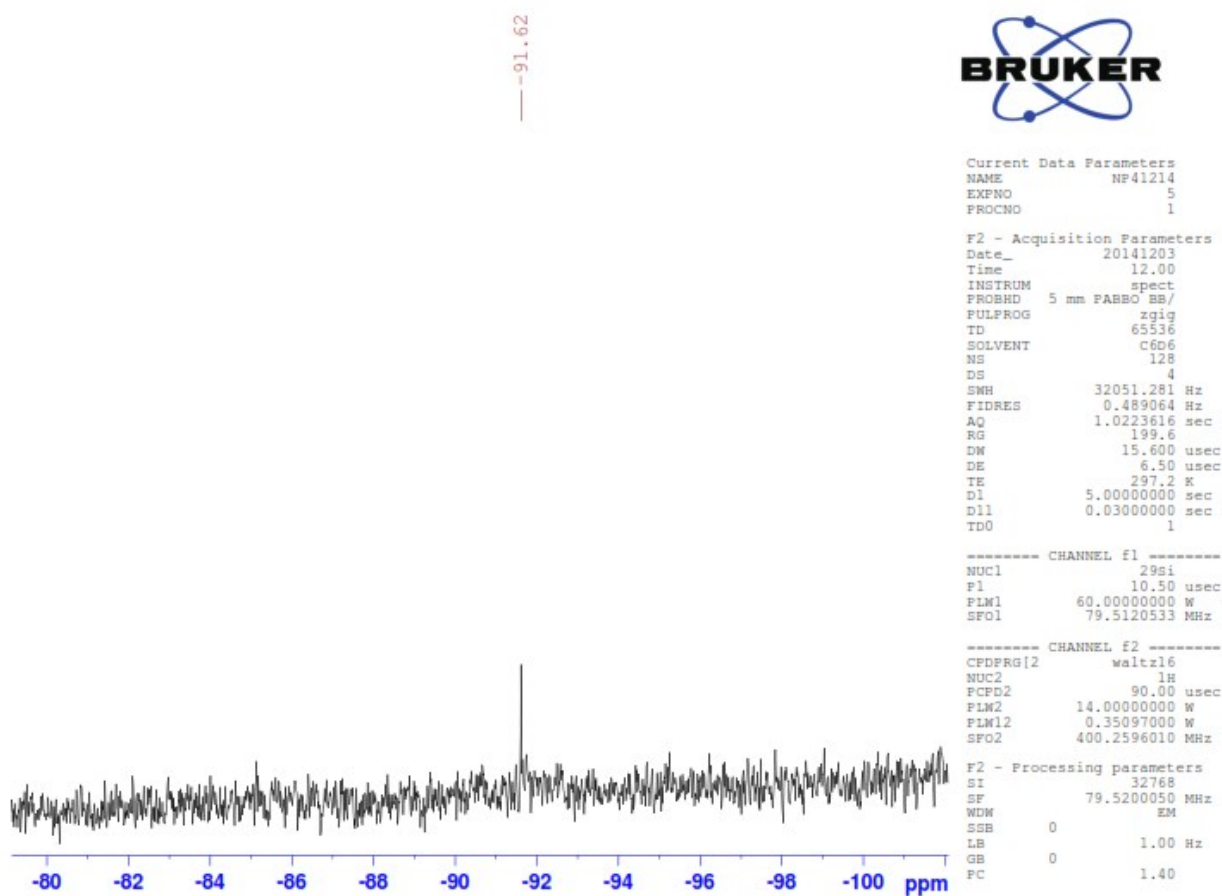

Figure S15.  $^{29}\text{Si}$  NMR spectrum of  $[(n\text{-Bu})_2\text{Sn}(\text{OSi}(\text{O}^t\text{Bu})_3)\text{Cl}]$  (**4**) in  $\text{C}_6\text{D}_6$ .

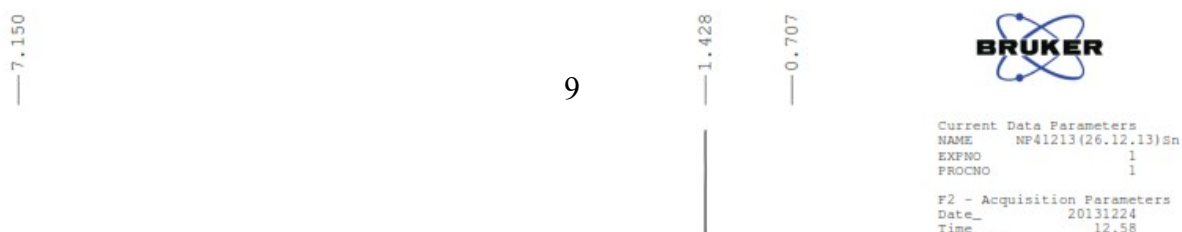

Figure S16. <sup>1</sup>H NMR spectrum of [(Me)<sub>2</sub>Sn(OSi(O<sup>t</sup>Bu)<sub>3</sub>)<sub>2</sub>] (5) in C<sub>6</sub>D<sub>6</sub>.

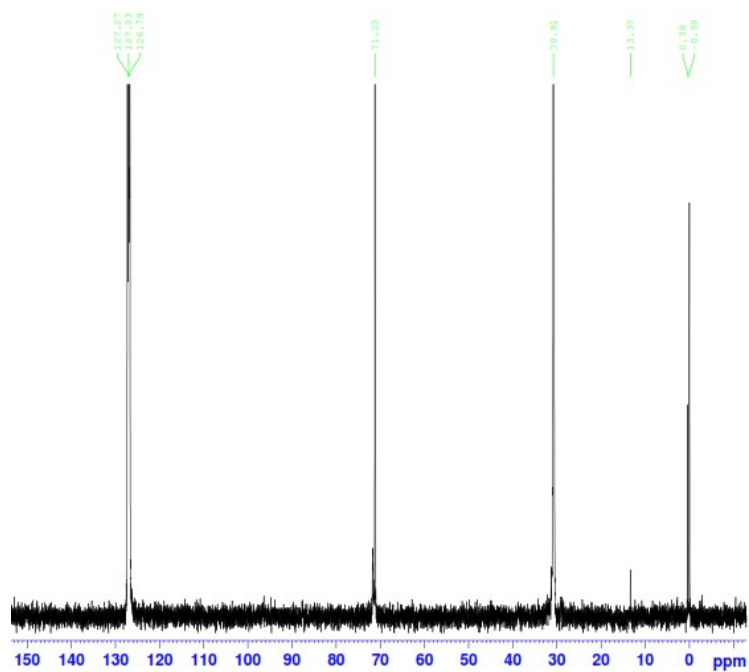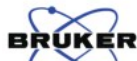

```

Current Data Parameters
NAME      NP41213(26.12.13)Sn
EXPNO    5
PROCNO   1

F2 - Acquisition Parameters
Date_    20131224
Time     13.29
INSTRUM  spect
PROBHD   5 mm PABBO BB/
PULPROG  zgpg30
TD       65536
SOLVENT  CDCl3
NS       512
DS       4
SWH      24038.461 Hz
FIDRES   0.366798 Hz
AQ       1.3631488 sec
RG       143.73
DM       20.800 usec
DE       6.50 usec
TE       297.4 K
D1       2.00000000 sec
D11      0.03000000 sec
TD0      1

----- CHANNEL f1 -----
NUC1     13C
P1       9.80 usec
PLM1     58.00000000 W
SFO1     100.6250182 MHz

----- CHANNEL f2 -----
CPDPRG2  waltz16
NUC2     1H
PCPD2    90.00 usec
PLM2     14.00000000 W
PLM12    0.35097000 W
PLM13    0.28428999 W
SFO2     400.2536810 MHz

F2 - Processing parameters
SI       32768
SF       100.6250184 MHz
WDW      EM
SSB      0
LB       1.00 Hz
GB       0
PC       1.40
    
```

Figure S17. <sup>13</sup>C NMR spectrum of [(Me)<sub>2</sub>Sn(OSi(O<sup>t</sup>Bu)<sub>3</sub>)<sub>2</sub>] (5) in C<sub>6</sub>D<sub>6</sub>.

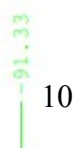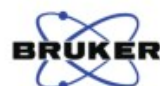

```

Current Data Parameters
NAME      NP41213(26.12.13)Sn
EXPNO    6
PROCNO   1

F2 - Acquisition Parameters
Date_    20131224
Time     13.43
INSTRUM
    
```

**Figure S18.**  $^{29}\text{Si}$  NMR spectrum of  $[(\text{Me})_2\text{Sn}(\text{OSi}(\text{O}^t\text{Bu})_3)_2]$  (**5**) in  $\text{C}_6\text{D}_6$ .

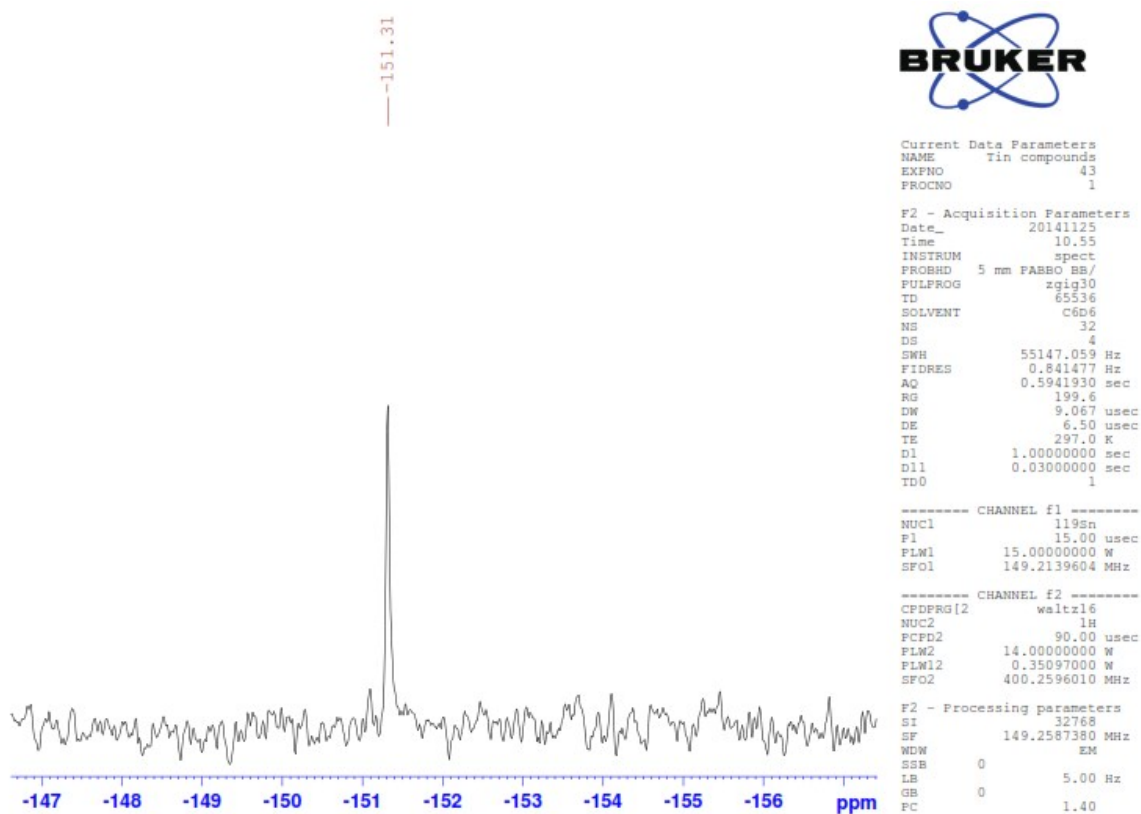

**Figure S19.**  $^{119}\text{Sn}$  NMR spectrum of  $[(\text{Me})_2\text{Sn}(\text{OSi}(\text{O}^t\text{Bu})_3)_2]$  (**5**) in  $\text{C}_6\text{D}_6$ .

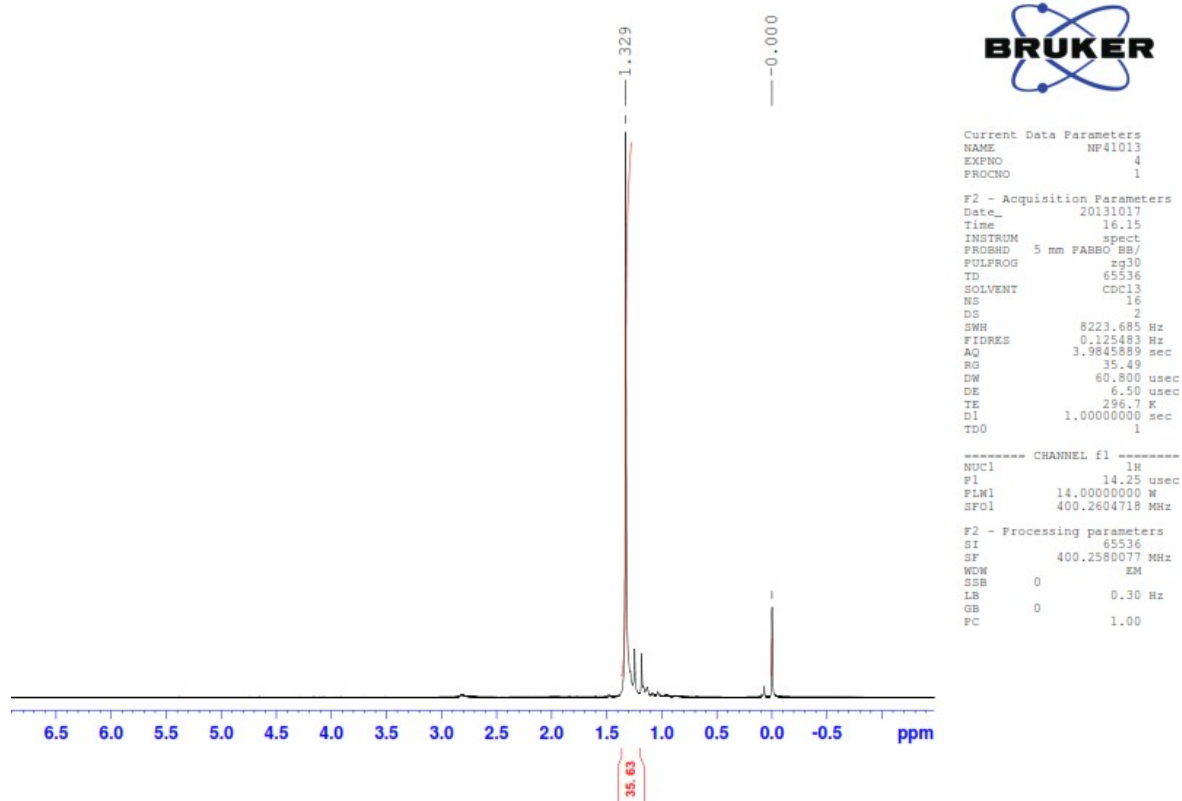

Figure S20.  $^1\text{H}$  NMR spectrum of  $[(\text{Me})_2\text{Sn}(\text{OSi}(\text{O}^t\text{Bu})_3)\text{Cl}]$  (**6**) in  $\text{CDCl}_3$ .

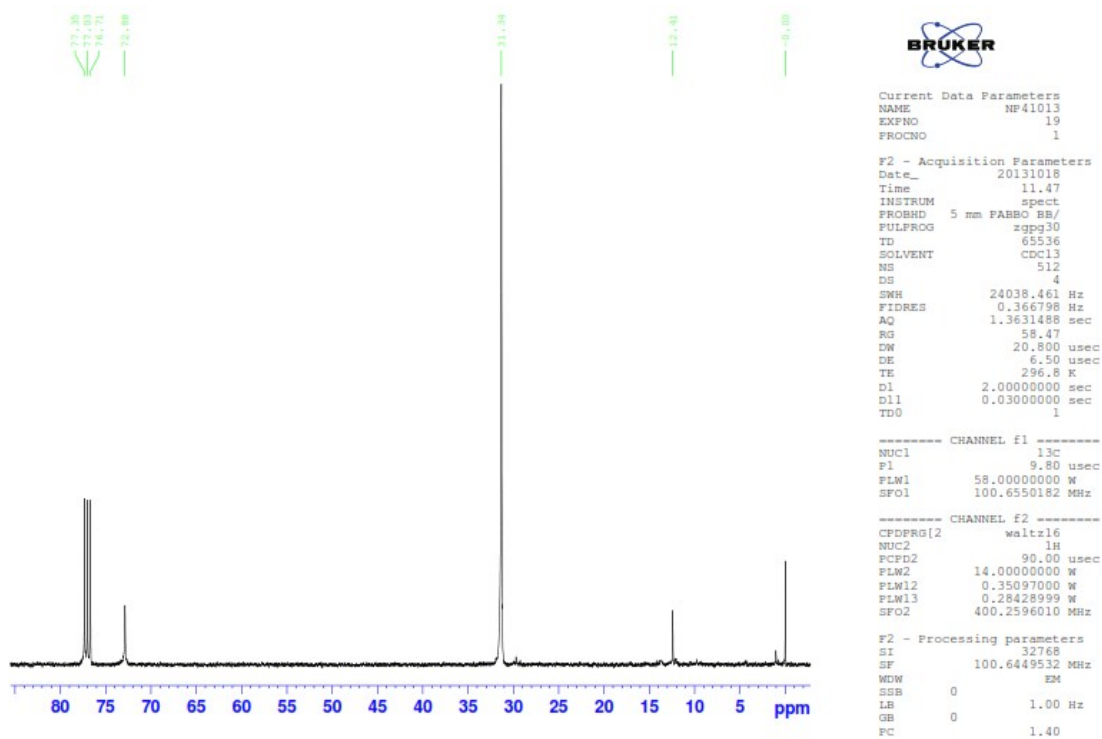

Figure S21.  $^{13}\text{C}$  NMR spectrum of  $[(\text{Me})_2\text{Sn}(\text{OSi}(\text{O}^t\text{Bu})_3)\text{Cl}]$  (**6**) in  $\text{CDCl}_3$ .

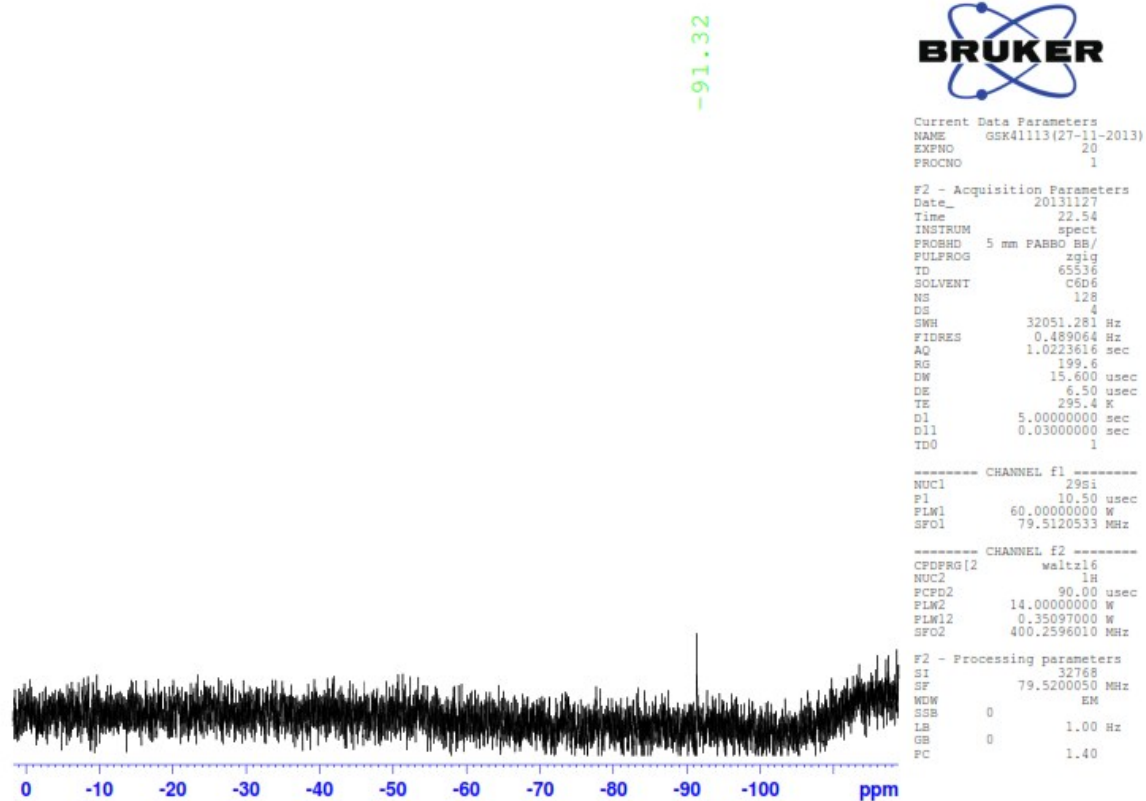

Figure S22.  $^{29}\text{Si}$  NMR spectrum of  $[(\text{Me})_2\text{Sn}(\text{OSi}(\text{O}^t\text{Bu})_3)\text{Cl}]$  (**6**) in  $\text{C}_6\text{D}_6$ .

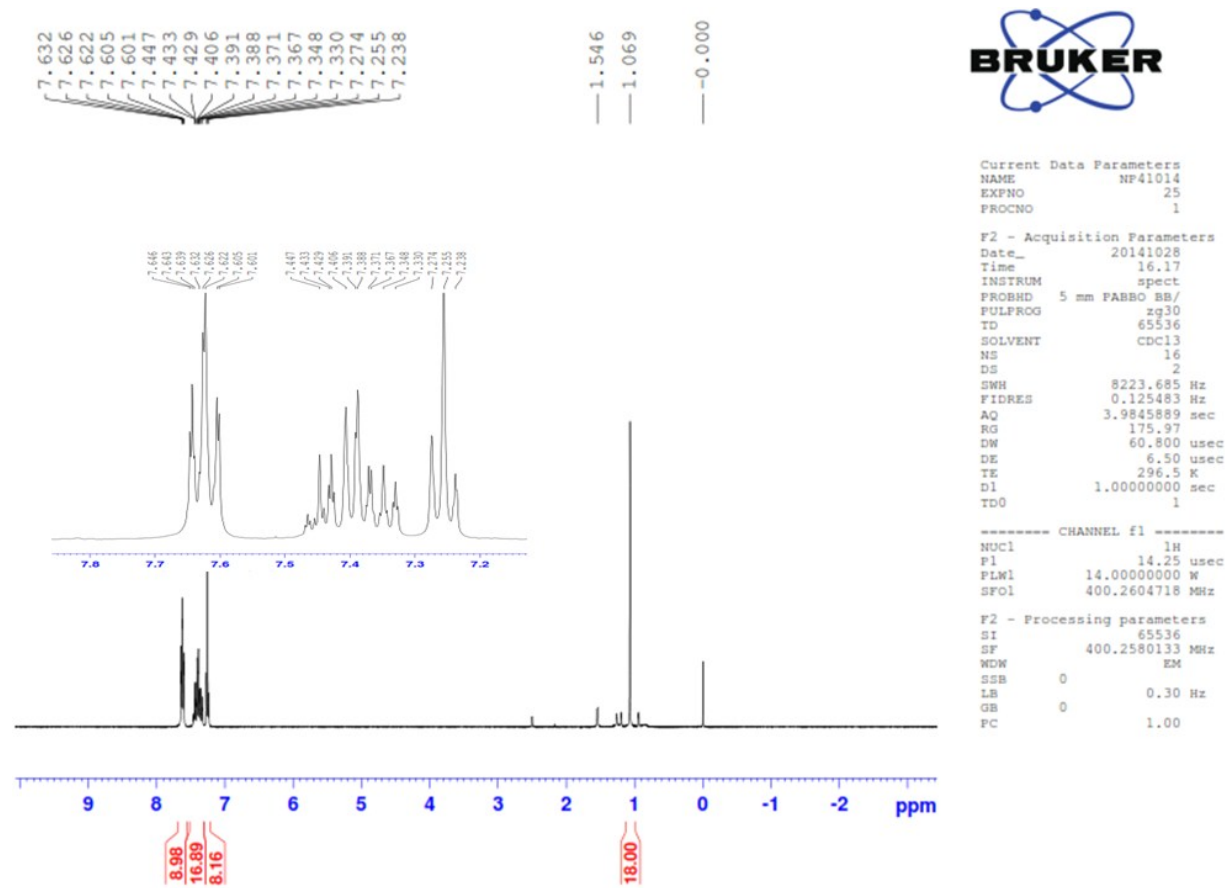

Figure S23.  $^1\text{H}$  NMR spectrum of  $[(^t\text{Bu})_2\text{Sn}(\text{OSiPh}_3)_2]$  (**7**) in  $\text{CDCl}_3$ .

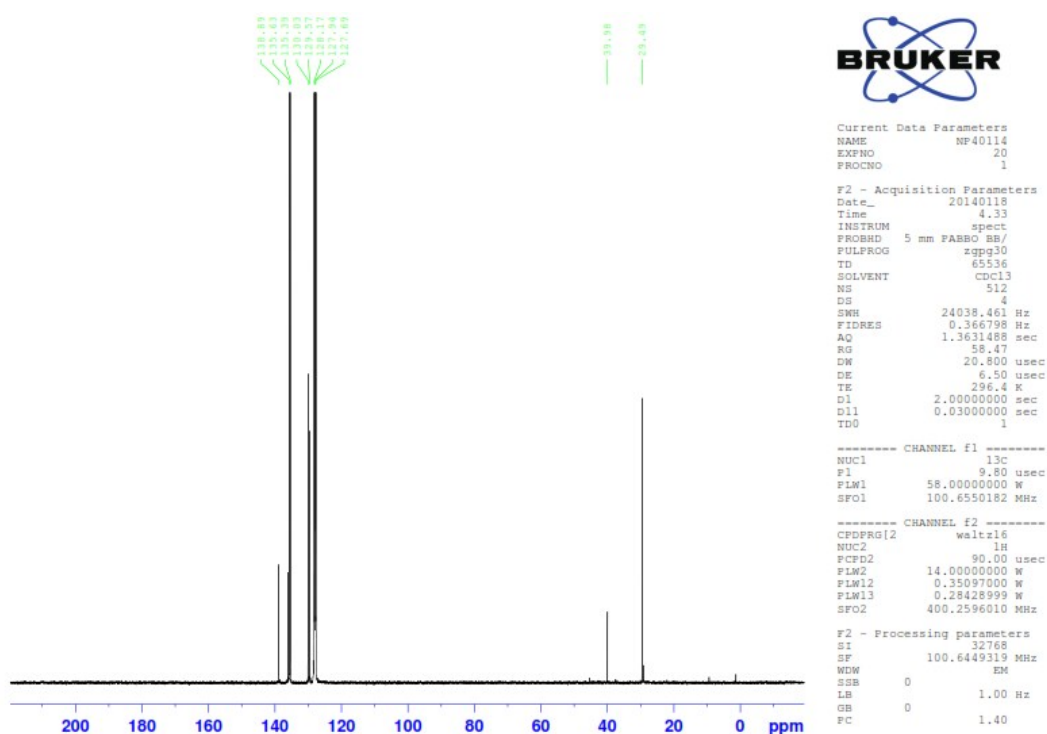

Figure S24.  $^{13}\text{C}$  NMR spectrum of  $[(t\text{Bu})_2\text{Sn}(\text{OSiPh}_3)_2]$  (**7**) in  $\text{CDCl}_3$ .

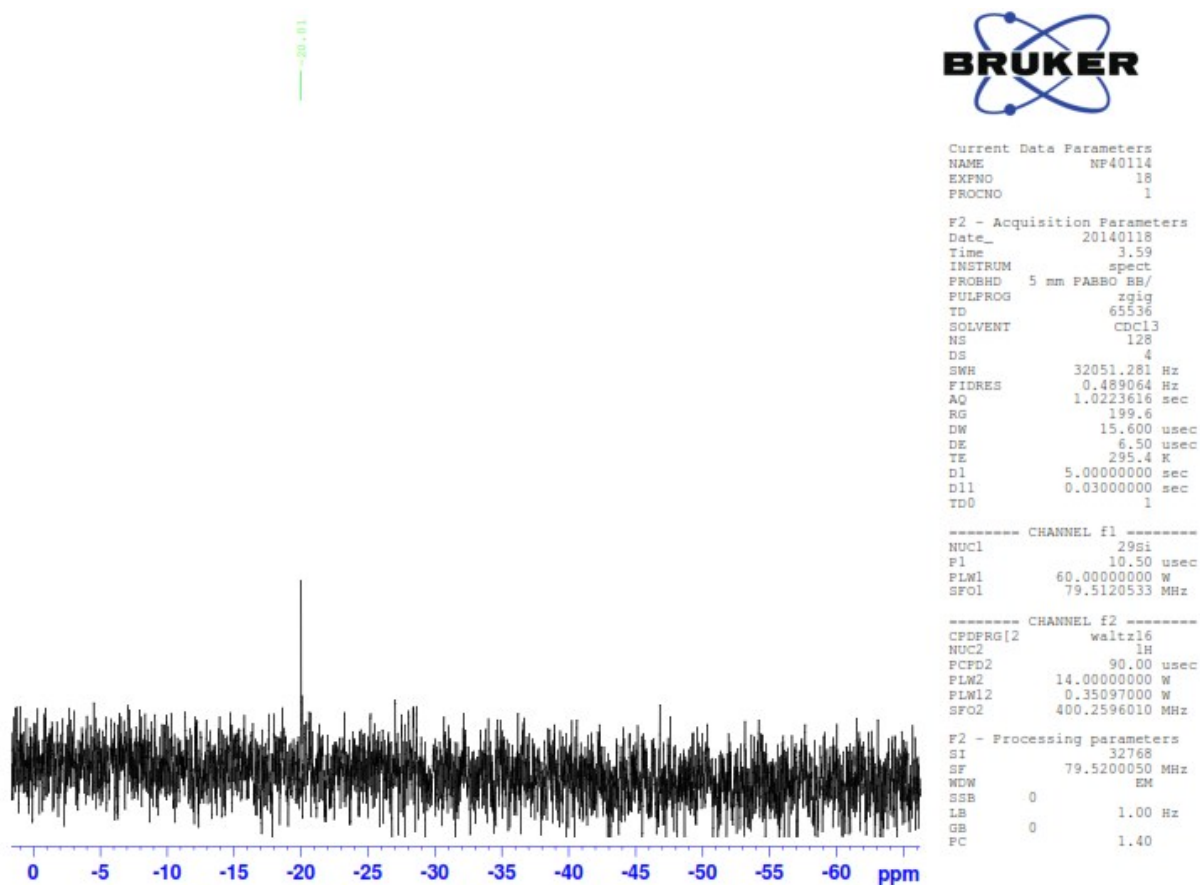

Figure S25.  $^{29}\text{Si}$  NMR spectrum of  $[(t\text{Bu})_2\text{Sn}(\text{OSiPh}_3)_2]$  (**7**) in  $\text{CDCl}_3$ .

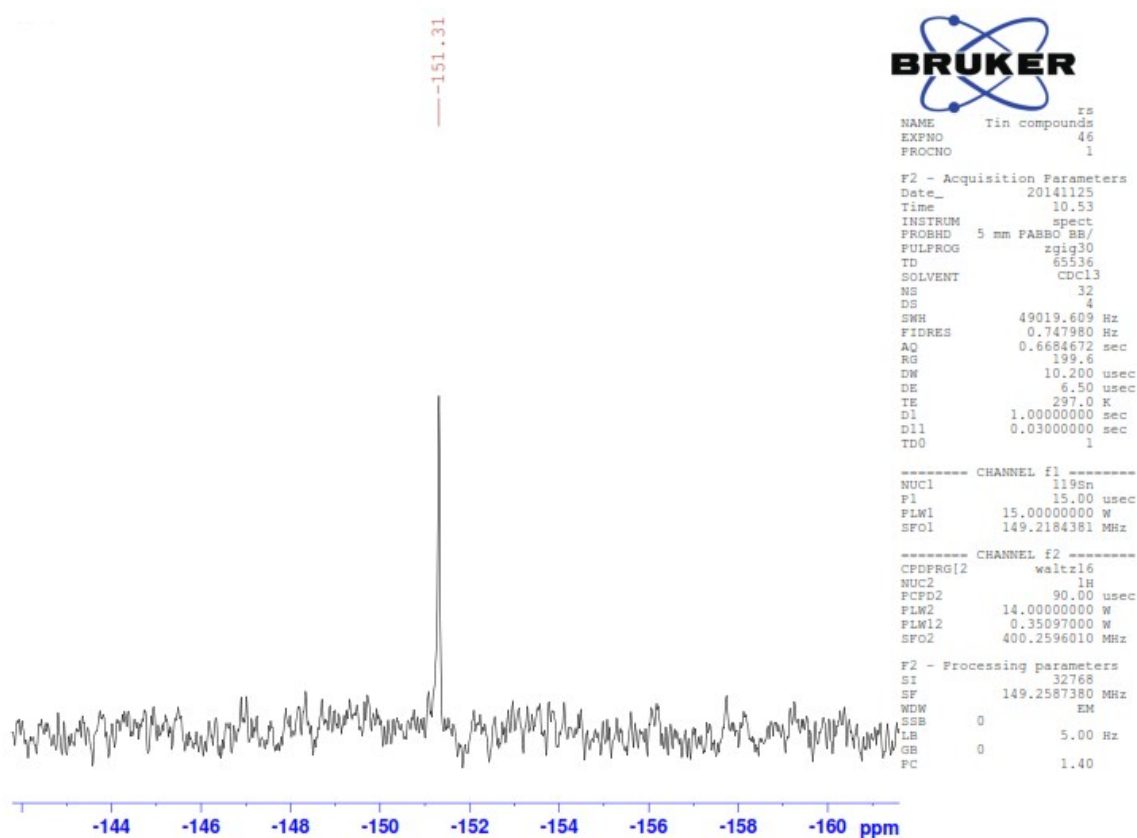

Figure S26.  $^{119}\text{Sn}$  NMR spectrum of  $[(t\text{Bu})_2\text{Sn}(\text{OSiPh}_3)_2]$  (**7**) in  $\text{CDCl}_3$ .

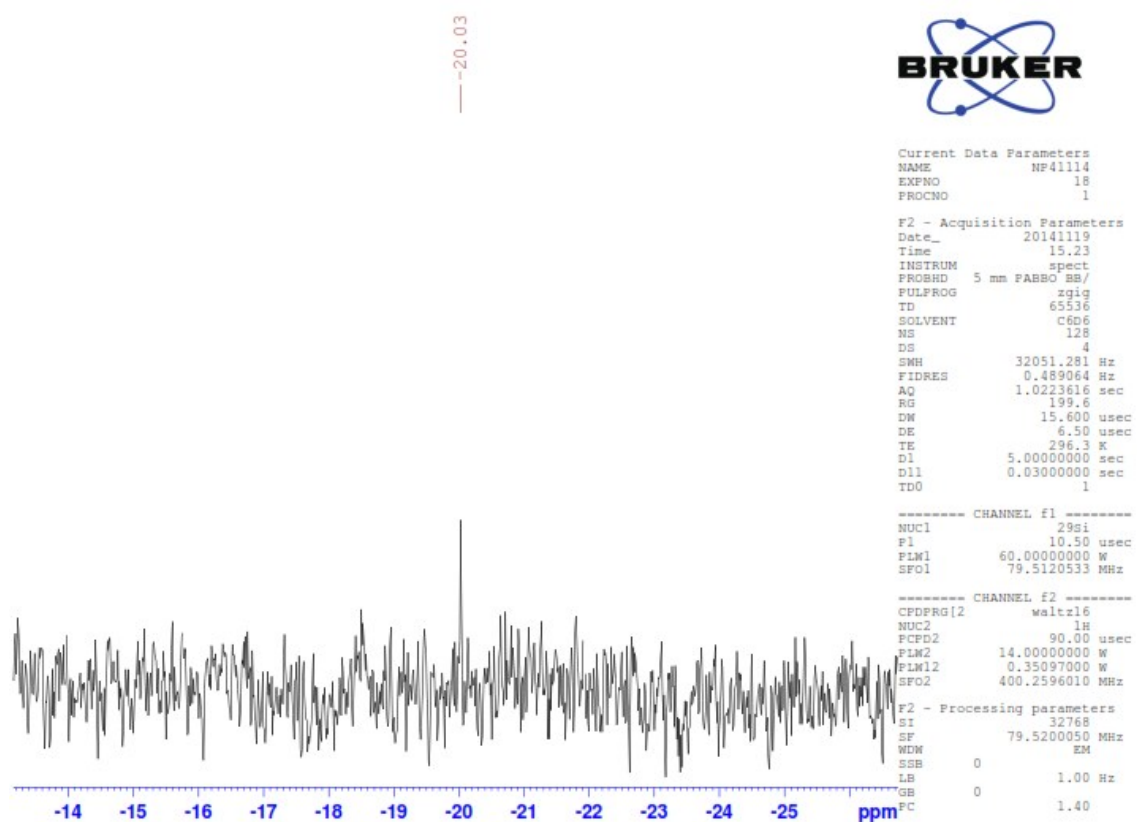

Figure S27.  $^{29}\text{Si}$  NMR spectrum of  $[(t\text{Bu})_2\text{Sn}(\text{OSiPh}_3)\text{Cl}]$  (**8**) in  $\text{C}_6\text{D}_6$ .

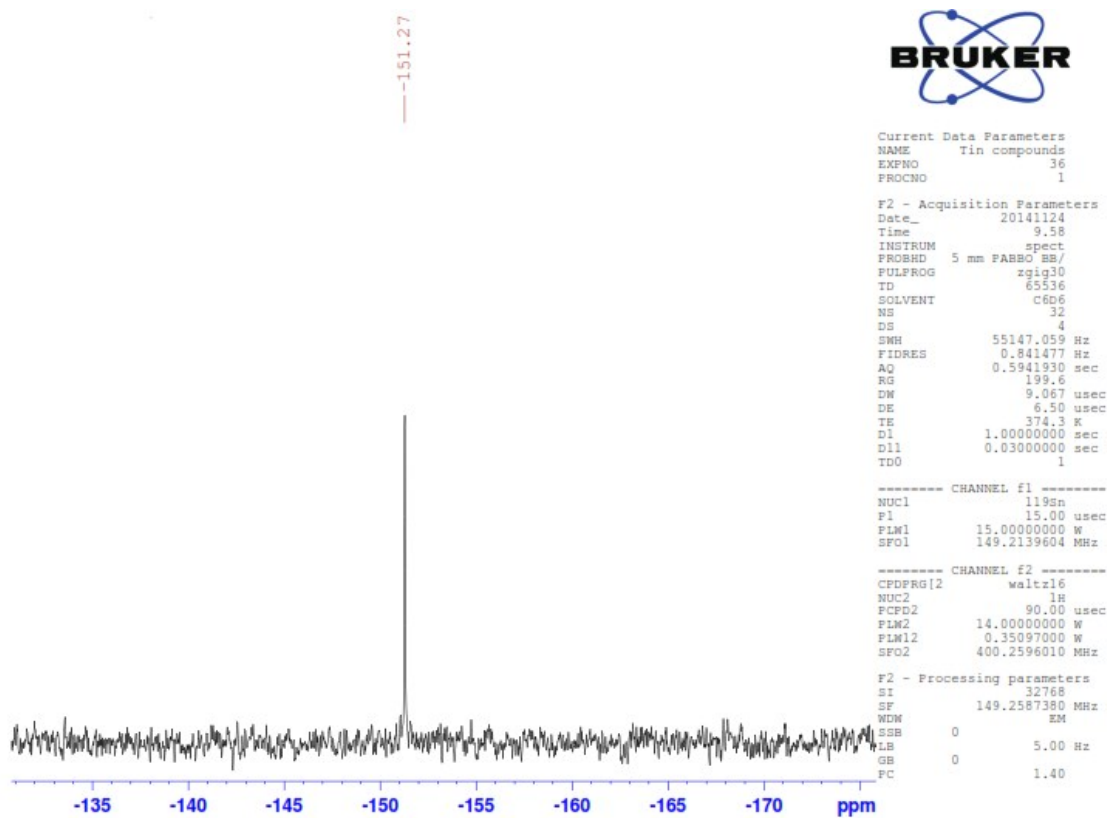

**Figure S28.**  $^{119}\text{Sn}$  NMR spectrum of  $[(t\text{Bu})_2\text{Sn}(\text{OSiPh}_3)\text{Cl}]$  (**8**) in  $\text{C}_6\text{D}_6$ .

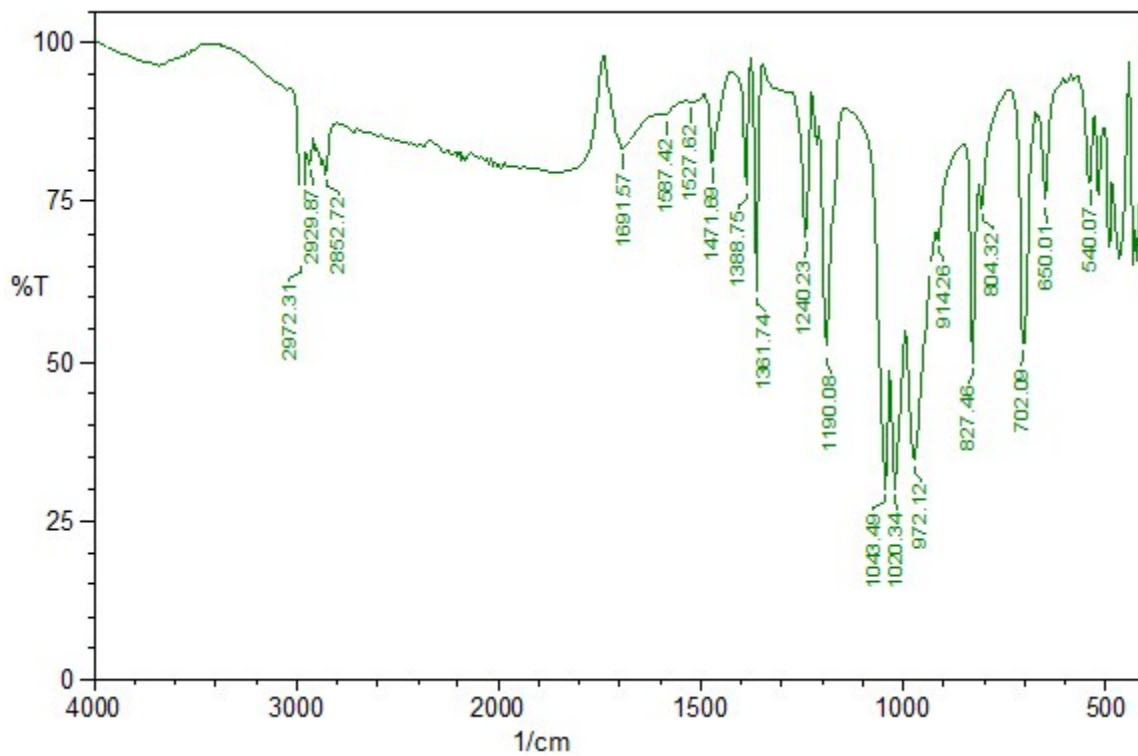



**Figure S29.** FT-IR spectrum of  $[(t\text{Bu})_2\text{Sn}(\text{OSi}(t\text{Bu})_3)_2]$  (**1**).

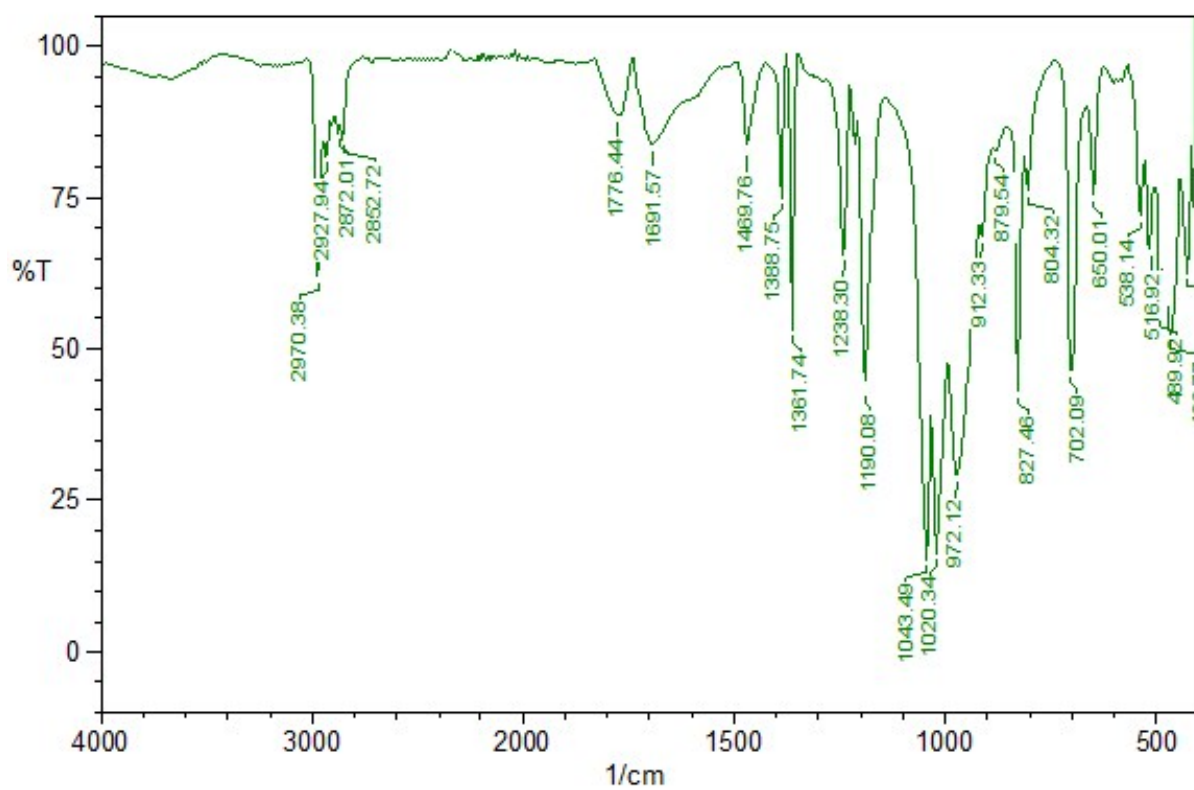

**Figure S30.** FT-IR spectrum of  $[(n\text{-Bu})_2\text{Sn}(\text{OSi}(\text{O}^t\text{Bu})_3)_2]$  (**3**)

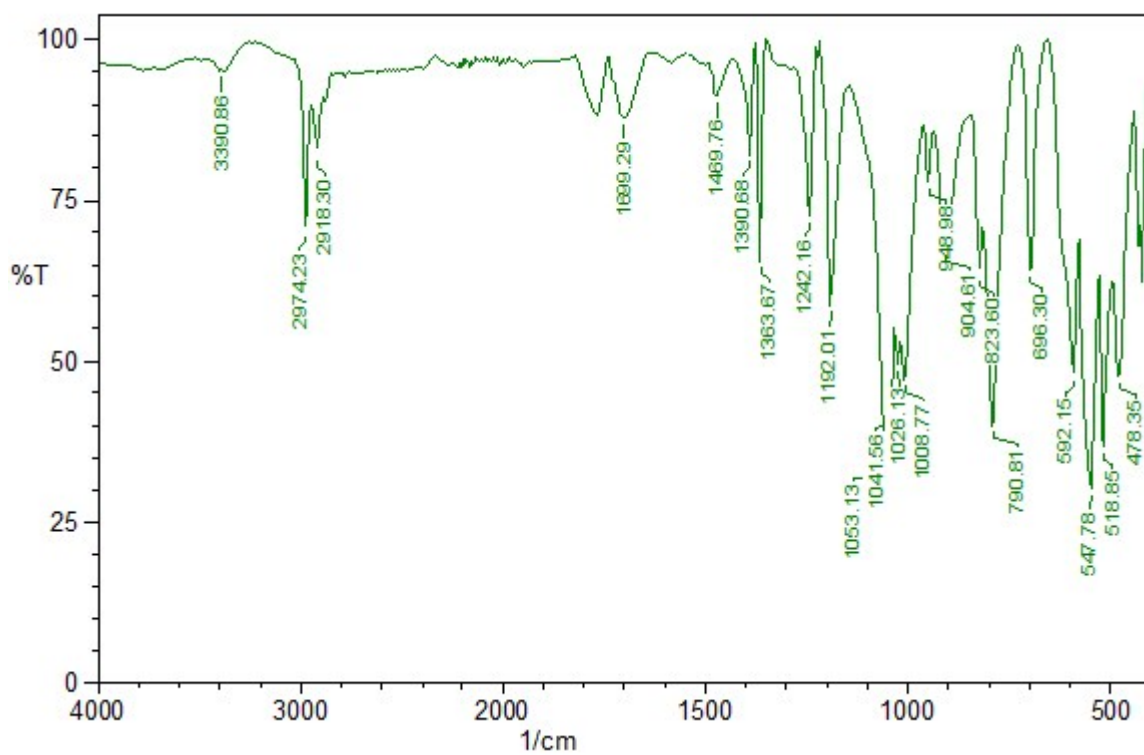

**Figure S31.** FT-IR spectrum of  $[(\text{Me})_2\text{Sn}(\text{OSi}(\text{O}^t\text{Bu})_3)_2]$  (**5**).

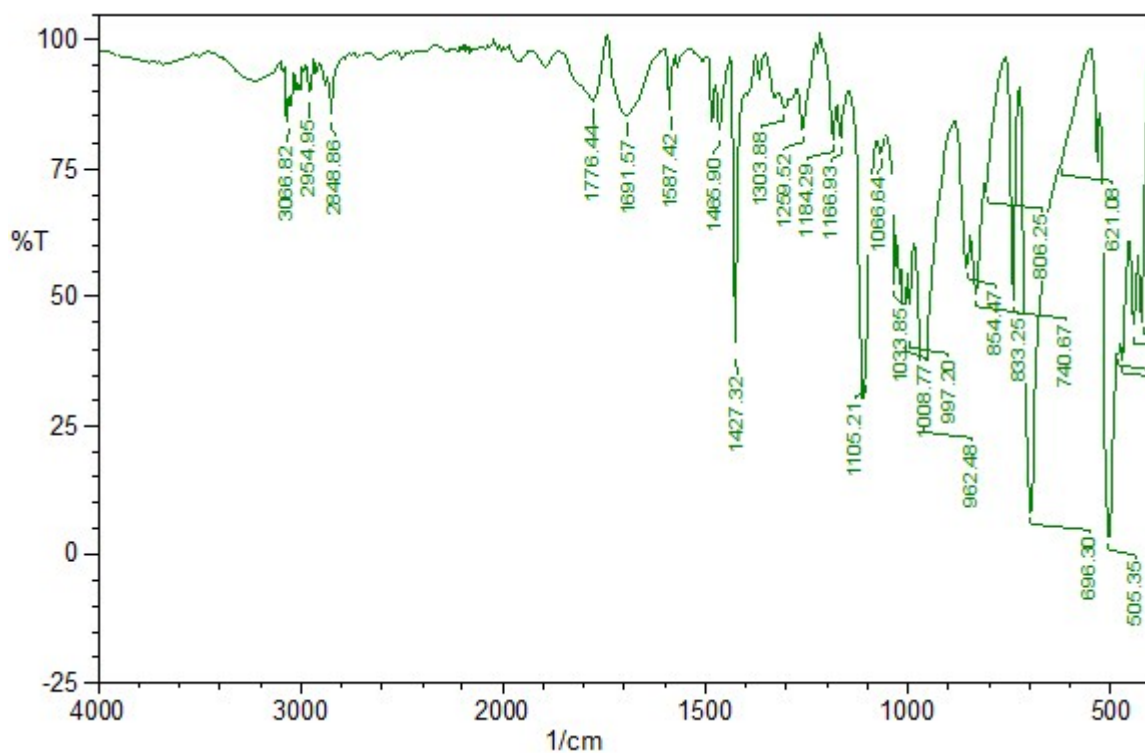

Figure S32. FT-IR spectrum of  $[(t\text{Bu})_2\text{Sn}(\text{OSiPh}_3)_2]$  (**7**)

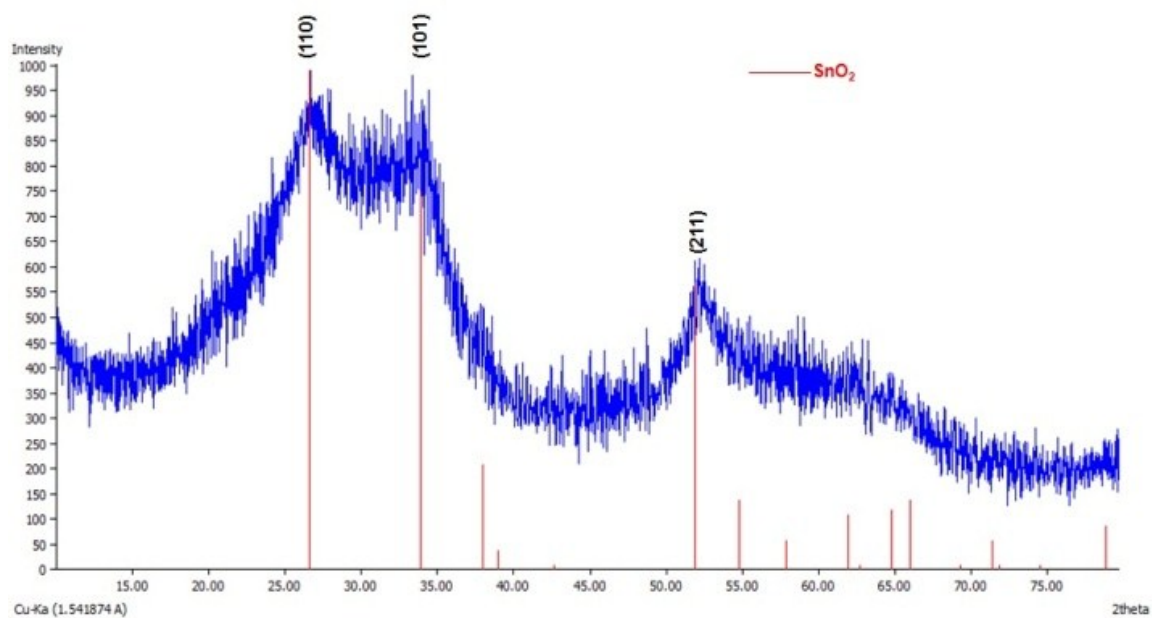

Figure S33. Powder XRD patterns of the tinsilicate material obtained from degradation of **1**.

## References

1. V. Chandrasekhar, R. Thirumoorthi, R. K. Metre, B. Mahanti, *J. Organomet. Chem.*, 2011, **696**, 600–606.
2. C. W. Terry, P. K. Ganzal, T. D. Tilley, *Chem. Mater.*, 1992, **4**, 1290–1295.
3. V. Chandrasekhar, R. Thirumoorthi, *Organometallics*, 2009, **28**, 2096–2106.
4. K. W. Terry, K. Su, T. D. Tilley, A. L. Rheingold, *Polyhedron*, 1997, **17**, 891–897.
5. K. W. Terry, C. G. Lugmair, P. K. Gantzel, and T. D. Tilley, *Chem. Mater.*, 1996, **8**, 274–280.
6. (a) K. Samedov, Y. Aksu, M. Driess, *ChemPlusChem.*, 2012, **00**, 1–13. (b) M. Tsaroucha, Y. Aksu, J. D. Epping, M. Driess, *ChemPlusChem.*, 2013, **78**, 62–69.
7. P. A. J. McManus, D. Cunningham, and M. J. Hynes, *J. Organometal. Chem.*, 1994, **468**, 87–92.
8. (a) J. Beckmann, K. Jurkschat, D. Dakternieks, A. E. K. Lim, K. F. Lim, *Organometallics*, 2001, **20**, 5125–5133. (b) V. I. Bakhmutov, *NMR spectroscopy in liquids and solids*, 2015, Taylor & Francis group CRC press.
9. (a) B. J. Brisden, M. F. Mahon, C. C. Reinford, *J. Chem. Soc. Dalton Trans.*, 1998, 3295–3300. (b) M. Lazell, M. Motevalli, S. A. A. Shah, A. C. Sullivan, *J. Chem. Soc. Dalton Trans.*, 1997, 3363–3366.
